# Supplementary material for: One-step synthesis and upconversion luminescence properties of hierarchical In2O3:Yb3+,Er3+ nanorod flowers
Source: Royal Society of Chemistry journal article supplement (doi:10.1039/c7ra10582g), 2017-01-01
Supplement: c7ra10582g1.pdf [file c7ra10582g1.pdf]

# **One-step synthesis and upconversion luminescence property of hierarchical $\text{In}_2\text{O}_3:\text{Yb}^{3+}, \text{Er}^{3+}$ nanorod flowers**

Yinhua Wang<sup>a</sup>, Yongsheng Zhu<sup>a\*</sup>, Xiumei Xu<sup>a</sup>, Jinshu Huang<sup>a</sup>, Zhiwen Lu<sup>a</sup>, and  
Dongfang Qiu<sup>a\*</sup>

<sup>a</sup> College of Physics and Electronic Engineering, College of Chemistry and Pharmaceutical Engineering, Nanyang Normal University, Nanyang 473061, China.

\*Corresponding author: [yongshengzhu0001@163.com](mailto:yongshengzhu0001@163.com), [qiudf2008@163.com](mailto:qiudf2008@163.com)

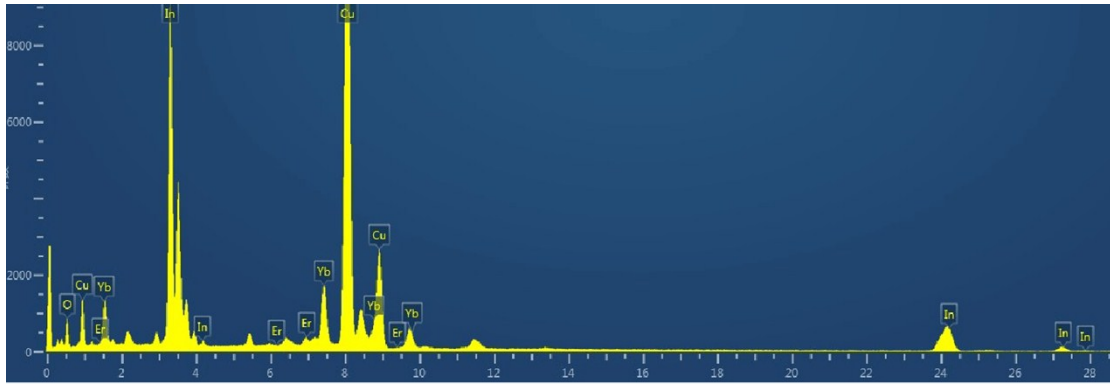

Fig. S1 Energy Dispersive X-ray spectra of as-prepared  $\text{In}_2\text{O}_3$ : (10 mol%) $\text{Yb}^{3+}$ , (2 mol%)  $\text{Er}^{3+}$  NRFs.

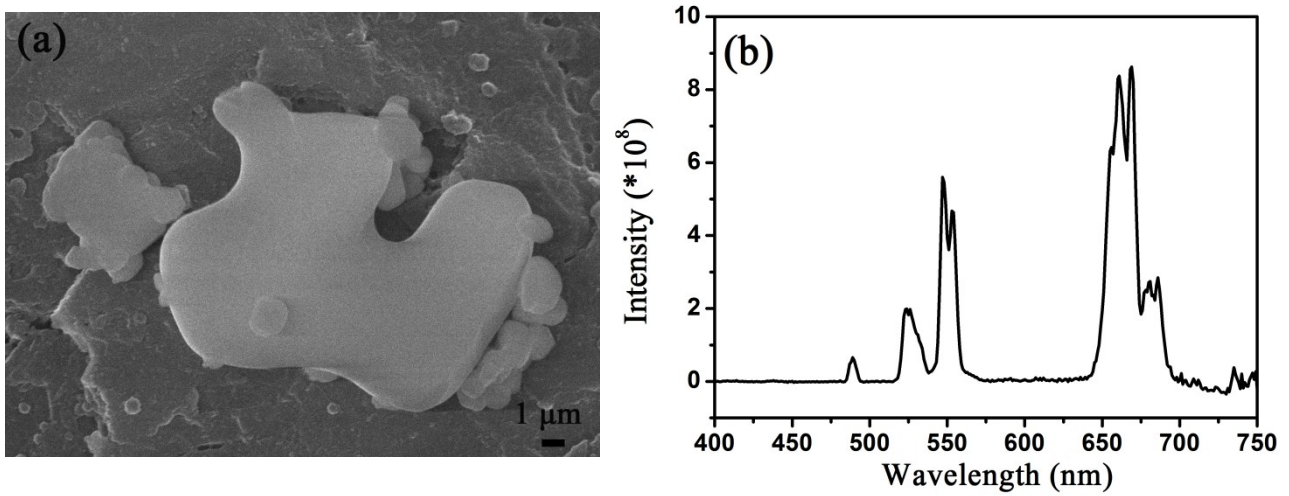

Fig. S2 (a) The SEM image of the  $\text{In}_2\text{O}_3:\text{Yb}^{3+}, \text{Er}^{3+}$  powder; (b) the UCL spectra of  $\text{In}_2\text{O}_3:\text{Yb}^{3+}, \text{Er}^{3+}$  powder.

For preparing co-doped  $\text{In}_2\text{O}_3$  powder,  $\text{In}(\text{NO}_3)_3 \cdot 4.5\text{H}_2\text{O}$ ,  $\text{Yb}(\text{NO}_3)_3 \cdot 6\text{H}_2\text{O}$  and  $\text{Er}(\text{NO}_3)_3 \cdot 6\text{H}_2\text{O}$  were used as starting materials. The  $\text{In}_2\text{O}_3:(10 \text{ mol}\%)\text{Yb}^{3+}, (1 \text{ mol}\%)\text{Er}^{3+}$  powder was prepared by the sol-gel method. In the preparation of the  $\text{In}_2\text{O}_3:\text{Yb}^{3+}, \text{Er}^{3+}$  precursor sol, stoichiometric amounts of  $\text{In}(\text{NO}_3)_3 \cdot 4.5\text{H}_2\text{O}$ ,  $\text{Yb}(\text{NO}_3)_3 \cdot 6\text{H}_2\text{O}$ ,  $\text{Er}(\text{NO}_3)_3 \cdot 6\text{H}_2\text{O}$  were dissolved in 10 ml water solution. The mixture was stirred for 3 hours, forming a transparent solution. The sample was sealed in crucibles and loaded into a laboratory box furnace. The furnace was heated to  $500 \text{ }^\circ\text{C}$  for 3 h and then cooled to room temperature naturally.
